# Supplementary material for: Efficient synthesis of riboflavin-imprinted magnetic nanoparticles by boronate affinity-based surface imprinting for the selective recognition of riboflavin
Source: Royal Society of Chemistry journal article supplement (doi:10.1039/c8an01044g), 2018-01-01
Supplement: c8an01044g1.pdf [file c8an01044g1.pdf]

*Supporting Information for*

**Efficient synthesis of riboflavin-imprinted magnetic nanoparticles by boronate affinity-based surface imprinting for the selective recognition of riboflavin**

Daojin Li<sup>a\*</sup>, Zijun Bie<sup>b</sup>, Fangfang Wang<sup>a</sup>, Enhui Guo<sup>a</sup>

<sup>a</sup>College of Chemistry and Chemical Engineering, and Henan Key Laboratory of Fuction-Oriented Porous Materials, Luoyang Normal University, Luoyang 471022, P. R. China. Address here. E-mail: lidaojin7910@126.com.

<sup>b</sup>Department of Chemistry Bengbu Medical College, 233030,

## Supporting Figures

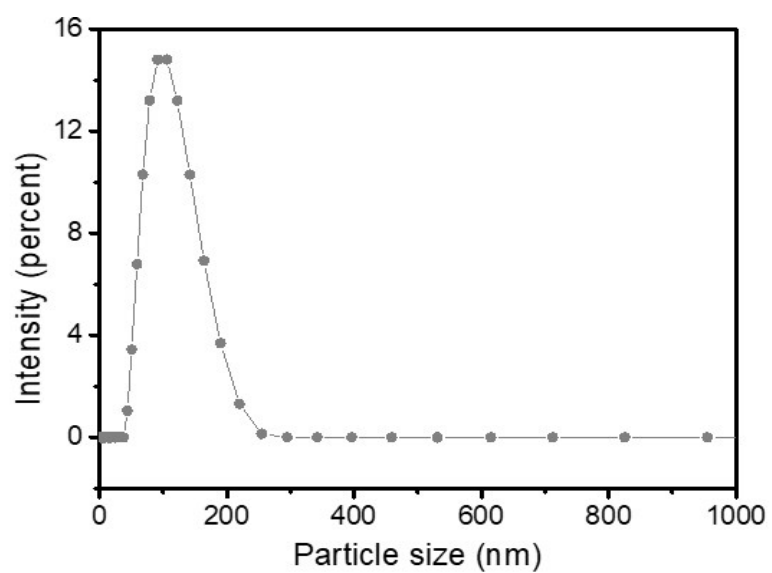

**Fig. S1** The particle size characterization of Fe<sub>3</sub>O<sub>4</sub>@MIPs by dynamic light scattering.

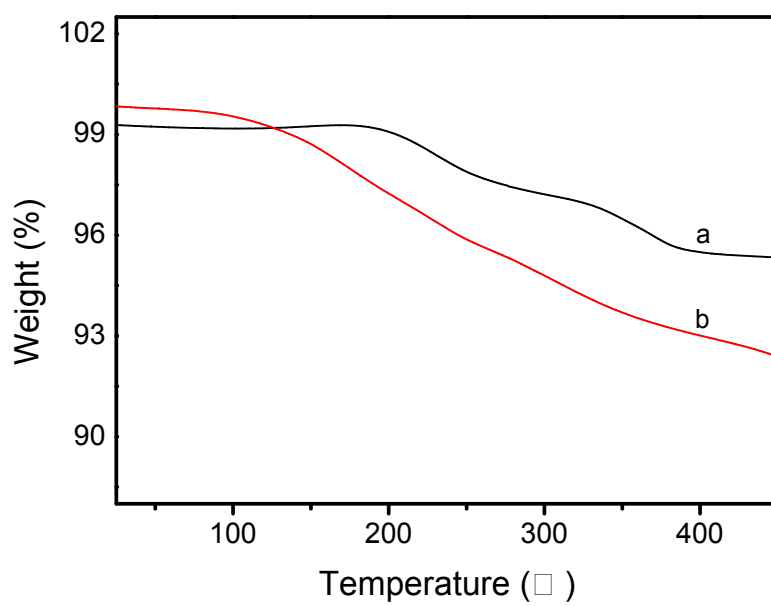

**Fig. S2** TGA curves of magnetic particles: (a) Fe<sub>3</sub>O<sub>4</sub>@AA and (b) Fe<sub>3</sub>O<sub>4</sub>@MIPs.

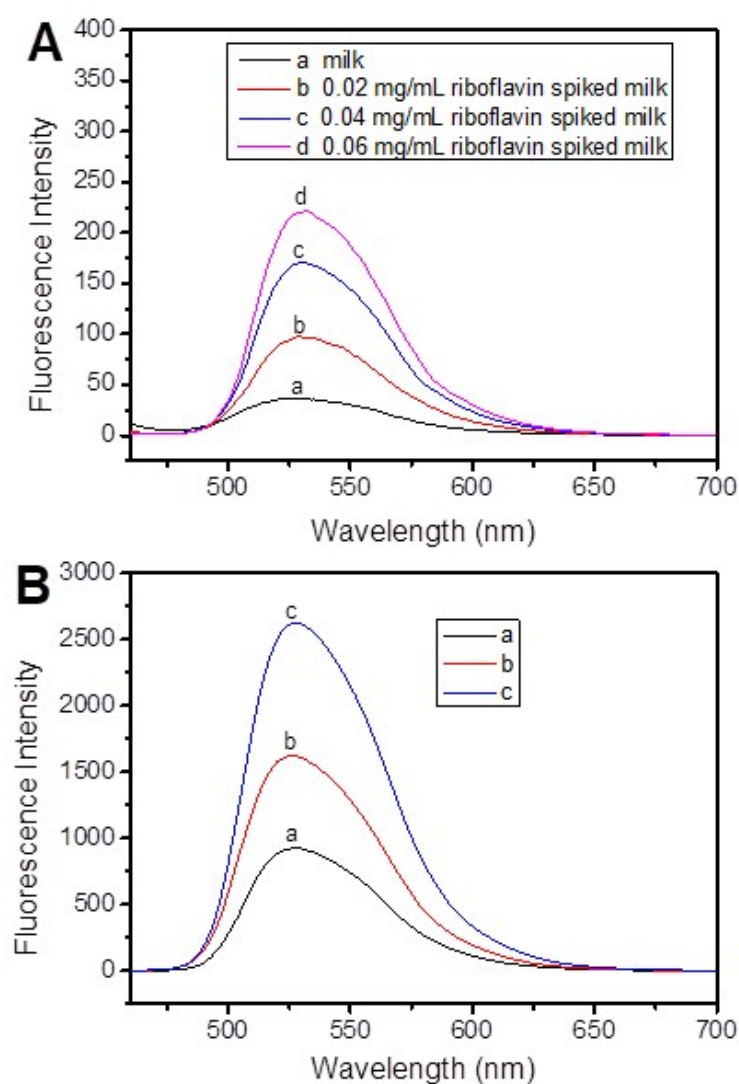

**Fig. S3** A) Fluorescence spectra for milk (a), milk spiked with 0.02 mg/mL(b), 0.04 mg/mL (c) and 0.06 mg/mL (d) riboflavin. B) Fluorescence spectra for extracted from 0.02 mg/mL riboflavin spiked milk (a), 0.04 mg/mL riboflavin spiked milk (b) and 0.06 mg/mL riboflavin spiked milk (c) by the riboflavin-imprinted MNPs.
